# Supplementary material for: Fetal growth restriction is a host specific response to infection with an impaired spiral artery remodeling-inducing strain of Porphyromonas gingivalis
Source: PubMed Central journal article supplement (PMC7471333; doi:10.1038/s41598-020-71762-9), 2020-09-03
Supplement: 41598_2020_71762_MOESM1_ESM.pdf [file 41598_2020_71762_MOESM1_ESM.pdf]

Fetal growth restriction is a host specific response to infection with an impaired spiral artery remodeling-inducing strain of *Porphyromonas gingivalis*

Tanvi Tavana<sup>1</sup>, Priscilla L. Phillips<sup>2</sup>, Xiao-jun Wu<sup>1</sup>, and Leticia Reyes<sup>1\*</sup>

**Table S1. Antibodies used for immunofluorescent staining and Western blot**

| Target antigen       | Dilution     | Host Organism      | Catalog #, Manufacturer                       |
|----------------------|--------------|--------------------|-----------------------------------------------|
| <i>P. gingivalis</i> | 1:2000       | Rabbit polyclonal  | Lot C7947, Custom made                        |
| Cytokeratin-7        | 1:200        | Mouse (clone LP1K) | Ab20206, Abcam (Cambridge, MA)                |
| $\alpha$ -actin      | 1:200        | Mouse (clone 1A4)  | MCA5781GA, Biorad Laboratories (Hercules, CA) |
| Htra1                | 1:200/1:1000 | Rabbit polyclonal  | PA5-79419, ThermoFisher (Waltham MA)          |
| Fstl3                | 1:500        | Rabbit polyclonal  | Orb183779, Biorbyt (San Francisco, CA)        |
| Mouse isotype        | 1:200        | Mouse IgG          | 31903, ThermoFisher (Waltham MA)              |
| Rabbit isotype       | 1:2000       | Rabbit polyclonal  | Lot C7947, pre-immune serum                   |
| Rabbit Ig ALEXA 594  | 1:1000       | Goat               | A-11037, Life Technologies (Grand Island, NY) |
| Mouse Ig ALEXA 594   | 1:1000       | Goat               | A-11032, Life Technologies (Grand Island, NY) |
| Rabbit Ig ALEXA 647  | 1:1000       | Goat               | A32733, Life Technologies (Grand Island, NY)  |
| Mouse Ig ALEXA 647   | 1:1000       | Goat               | A32728, Life Technologies (Grand Island, NY)  |
| Rabbit Ig ALEXA 488  | 1:1000       | Goat               | A32731, Life Technologies (Grand Island, NY)  |
| Mouse Ig ALEXA 488   | 1:1000       | Goat               | A32723, Life Technologies (Grand Island, NY)  |

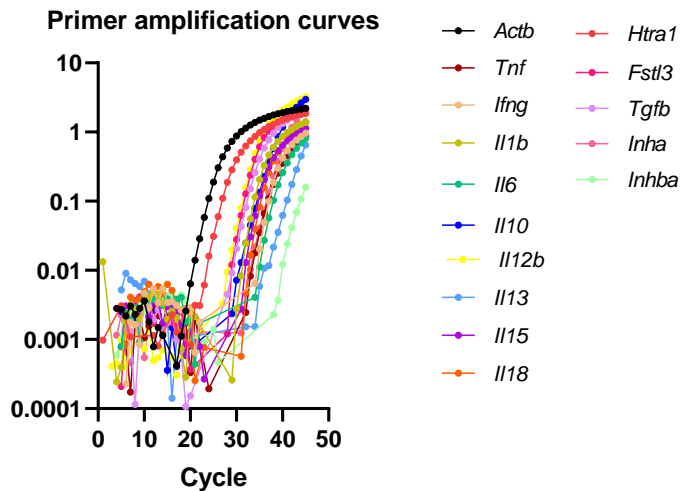

**Figure S1: Amplification plots of primers listed in Table S2. Data was generated from WIS placental tissues in which all genes were detected.**

**Table S2. Primers used for gene expression analysis**

| Gene                         | Primer                                      | Primer Sequence       |
|------------------------------|---------------------------------------------|-----------------------|
| <i>Tnf</i>                   | Qiagen QT00178717                           | -                     |
| <i>Ifng</i><br>(NM_138880.2) | Integrated DNA Technologies (IDT) Forward 1 | CGAATCGCACCTGATCACTAA |
|                              | IDT Reverse 1                               | TGGATCTGTGGGTTGTTTAC  |
| <i>IL1b</i>                  | Qiagen QT00181657                           | -                     |
| <i>IL 6</i>                  | Qiagen QT00182896                           | -                     |
| <i>IL 10</i>                 | Qiagen QT00177618                           | -                     |
| <i>IL 12b</i>                | Qiagen QT00188839                           | -                     |
| <i>IL 13</i>                 | Qiagen QT00184842                           | -                     |
| <i>IL 15</i>                 | Qiagen QT01813637                           | -                     |
| <i>IL 18</i>                 | Qiagen QT00183071                           | -                     |
| <i>Htra 1</i>                | Qiagen QT00178017                           | -                     |
| <i>Tgfb1</i>                 | Qiagen QT00187796                           | -                     |
| <i>Inha</i>                  | Qiagen QT00370258                           | -                     |
| <i>Inhba</i>                 | Qiagen QT00183918                           | -                     |
| <i>Fstl3</i>                 | Qiagen QT00191044                           | -                     |
| <i>Actb</i>                  | Qiagen QT00193473                           | -                     |

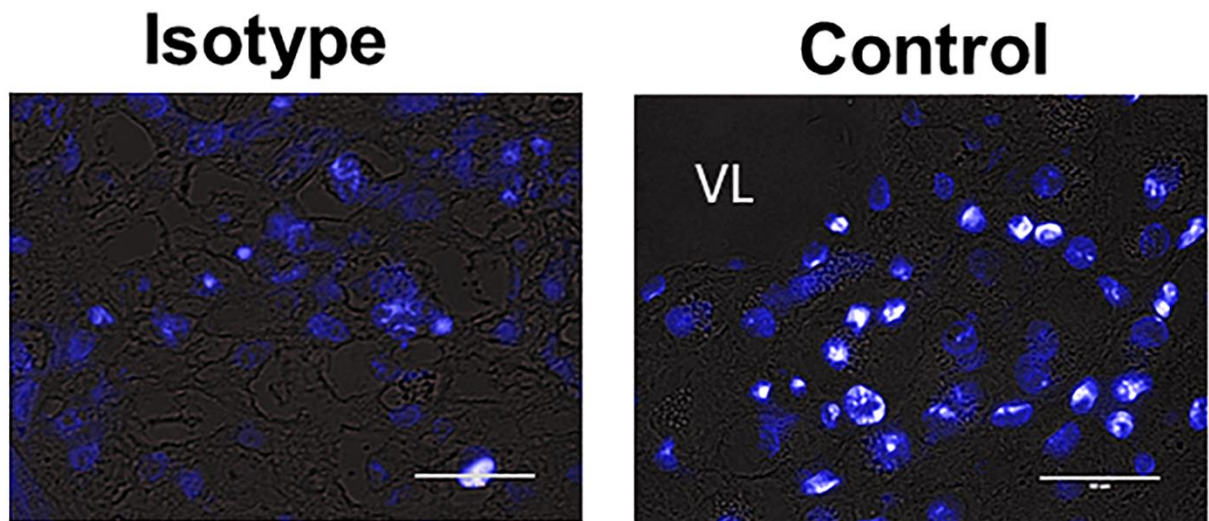

**Figure S2. Staining controls for *in situ* detection of *P. gingivalis* proteins in uteroplacental tissues.** Transillumination (grey) was used to define the tissue architecture. VL = vessel lumen. Nuclei were stained with DAPI (blue). Scale bar = 50  $\mu$ m.

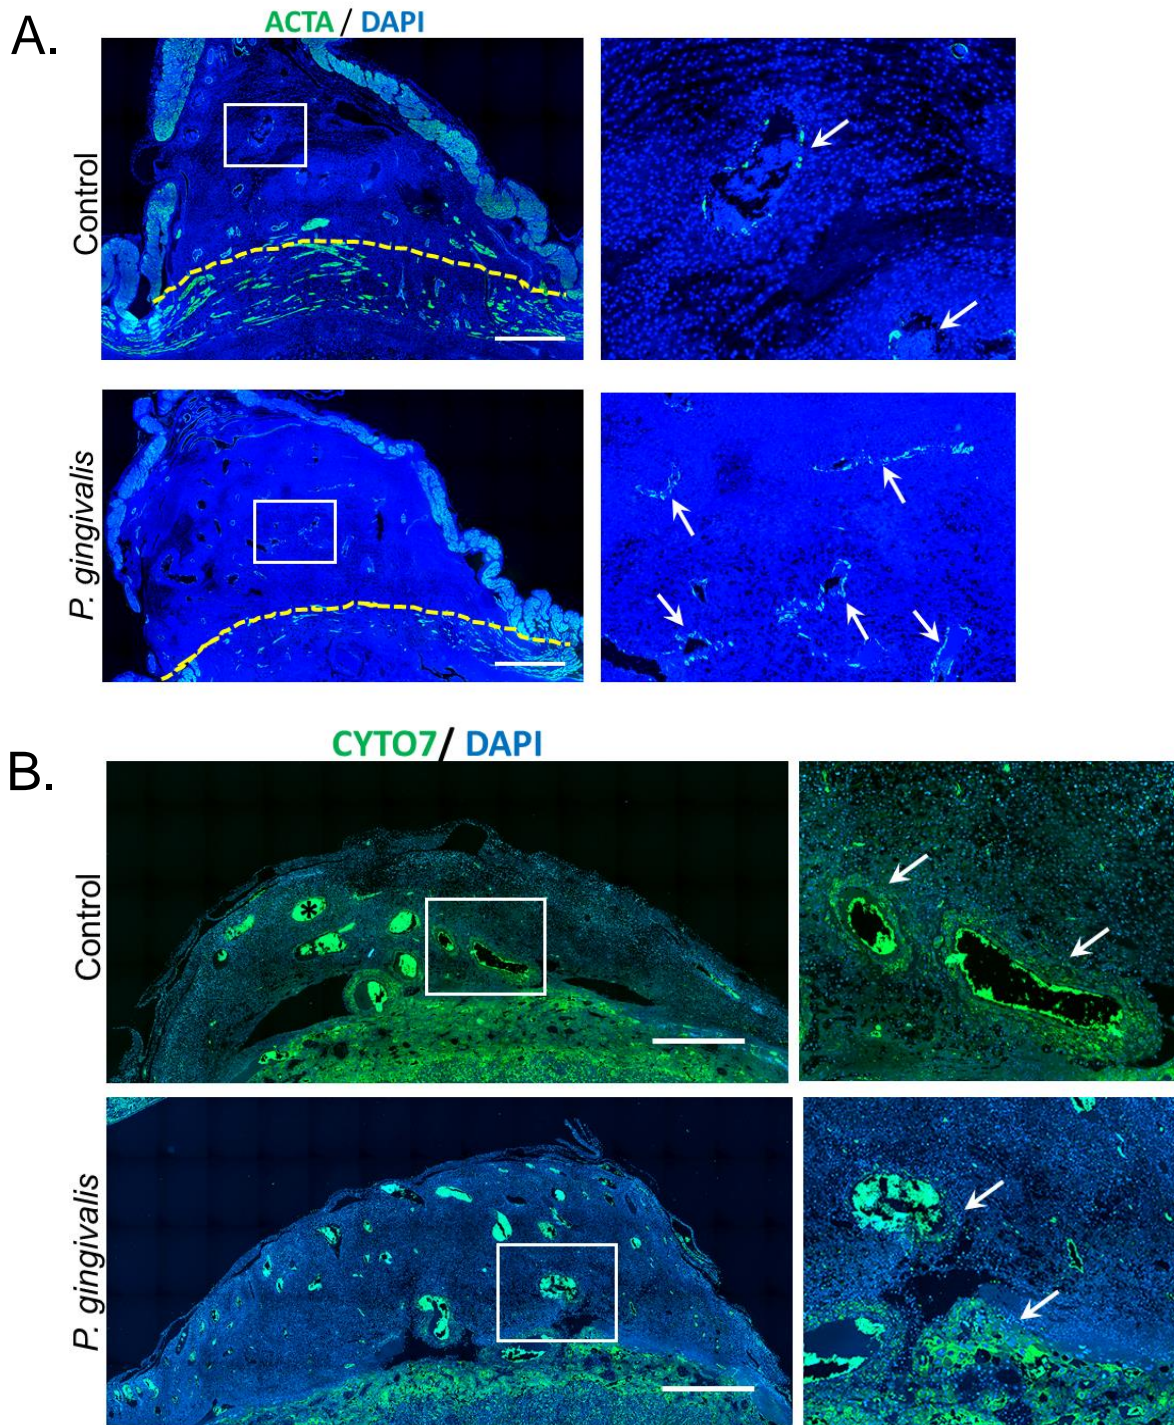

**Figure S3. Representative images of immunostained vascular smooth muscle cells (VSMC) (A) and extravillous trophoblasts (B) in GD18 placentae.** Images are tiled composites of individual pictures taken at 10X magnification with an EVOS Auto FL imaging system. A) Vascular smooth muscle cells (VSMC) were identified by  $\alpha$ -actin (ACTA) staining. Yellow dash line demarcates the edge between the decidua and the mesometrial triangle. B) Extravillous trophoblasts (EVT) were identified by cytokeratin 7 (CYTO7) staining. Boxed regions demarcate the magnified region shown in the corresponding panel on the right. White arrows indicate regions of interest (retained VSMC or invading EVT) Scale bar = 1000  $\mu$ m.

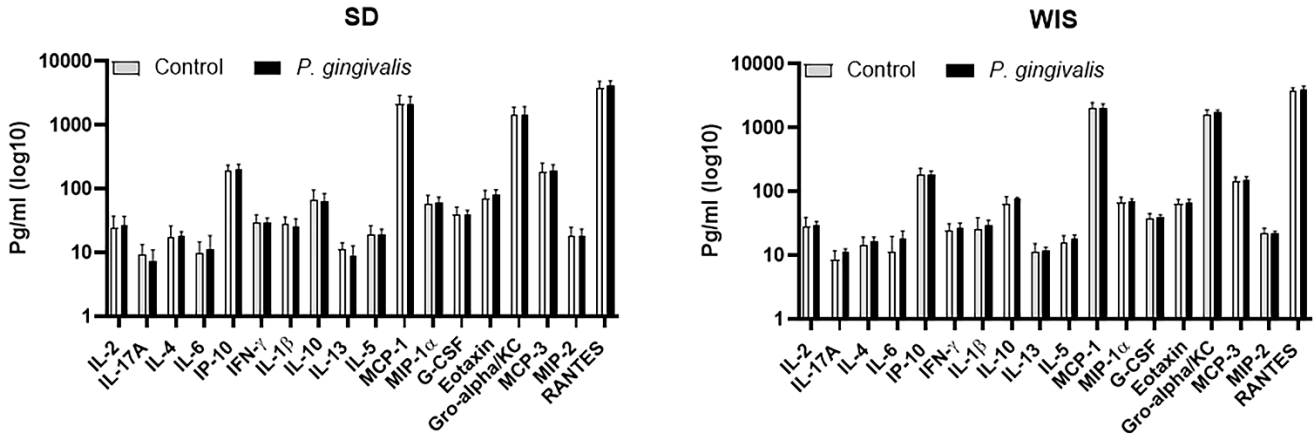

**Figure S4. Detection of circulation cytokines and chemokines in maternal serum (n = 5).** Fifty microliters of rat serum from each animal was used for analysis. Cytokines and chemokines were measured with a multiplex immunoassay (Rat Cytokine & Chemokine 22-plex ProcartaPlex Panel, Invitrogen, Catalog #EPX220-30122-901). The assay works on the principles of a sandwich ELISA on a magnetic bead platform and protein targets were measured with a Luminex instrument (ThermoFisher Scientific, Waltham MA).

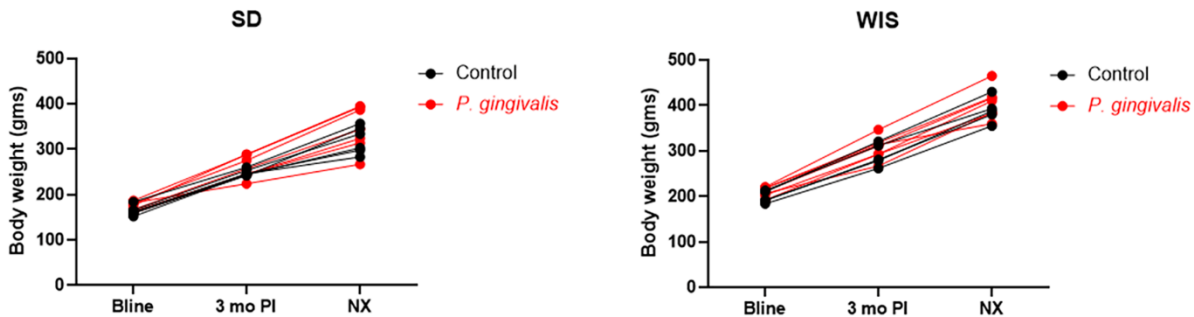

**Figure S5. Maternal weight gain from pre-inoculation (Blinc), to end of inoculation phase (3 mo PI) to time of necropsy (NX) at GD18.** Statistical analysis was performed on the slope of the line that was used to measure the degree of weight gain of each animal. One-way ANOVA of the slope of the lines indicated that there was no difference in weight gain among the groups ( $P = 0.2347$ ). Intrastrain student's t tests also indicated that infection did not affect the rate of maternal weight gain ( $P = 0.4531$  for SD, and  $P = 0.7398$  for WIS).

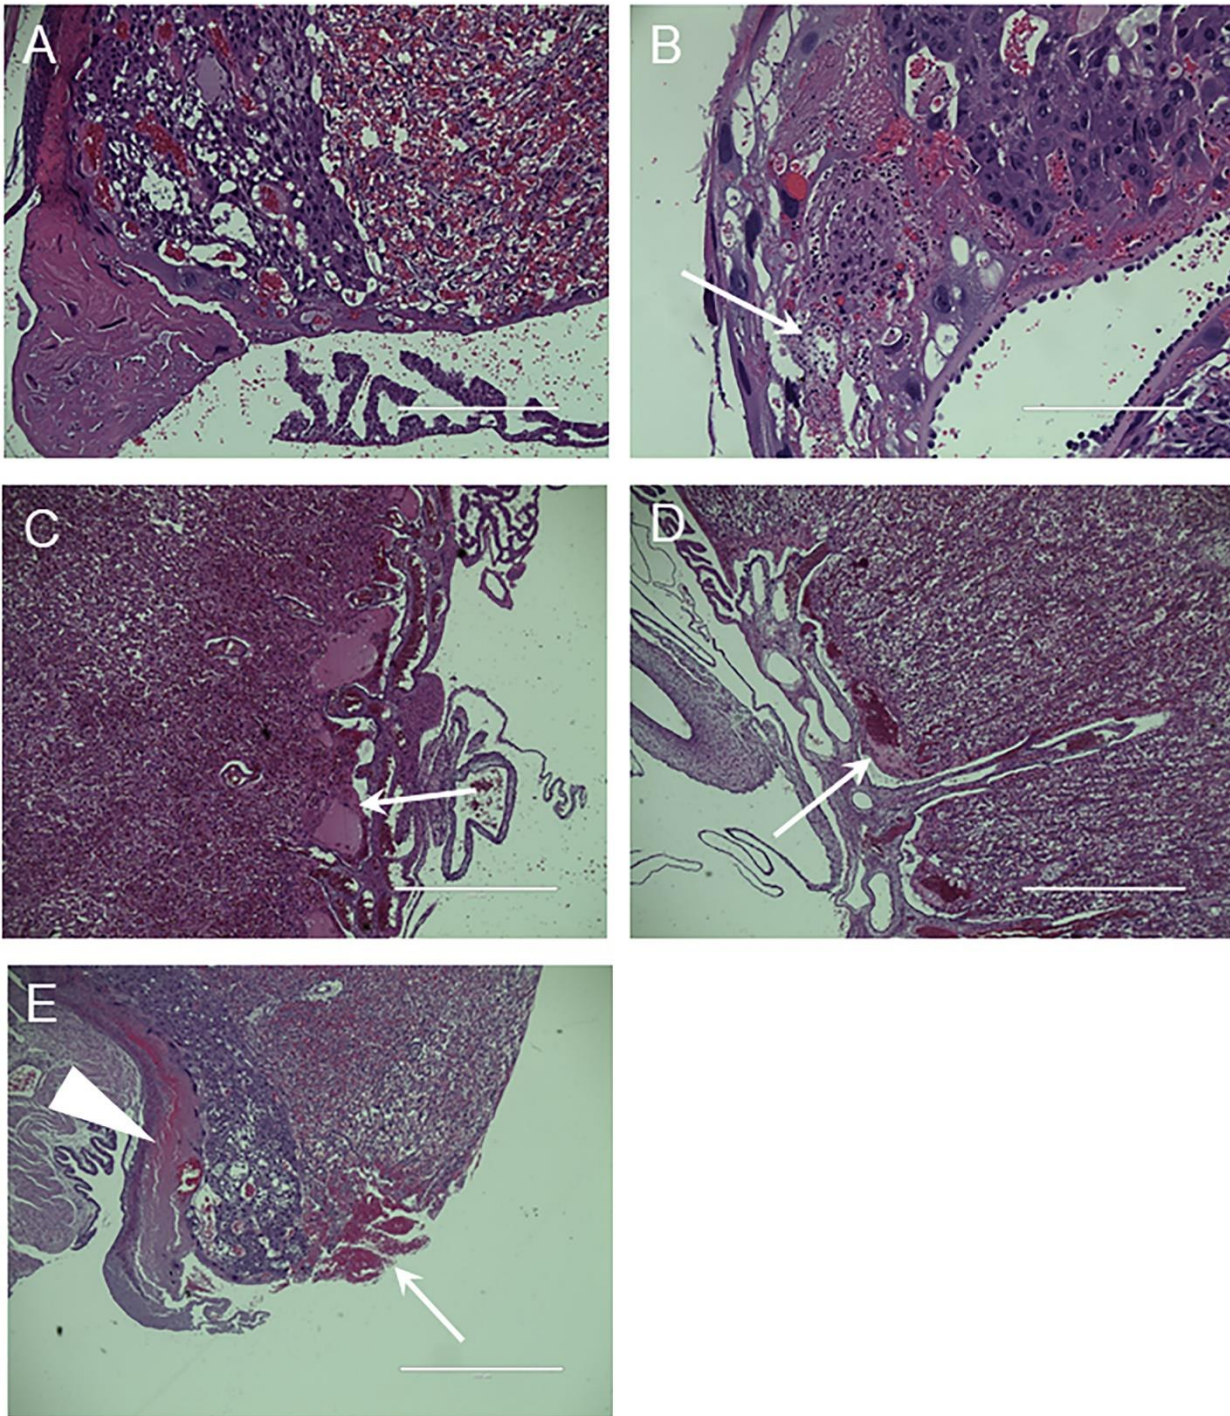

**Figure S6. Images of GD18 SD and WIS placenta.** A) Choriodecidual junction from a control specimen with no pathology. B) Leukocytic infiltration of the choriodecidual junction (white arrow) representative of a specimen with mild inflammation. C) A placental specimen with fibrinoid deposits near the chorionic plate (arrow). D) A placental specimen with placental infarcts near the chorionic plate (arrow). E) A placental specimen with a band of coagulative necrosis at the basal plate (arrowhead) and hemorrhage (arrow). Scale bar = 1000 μm.

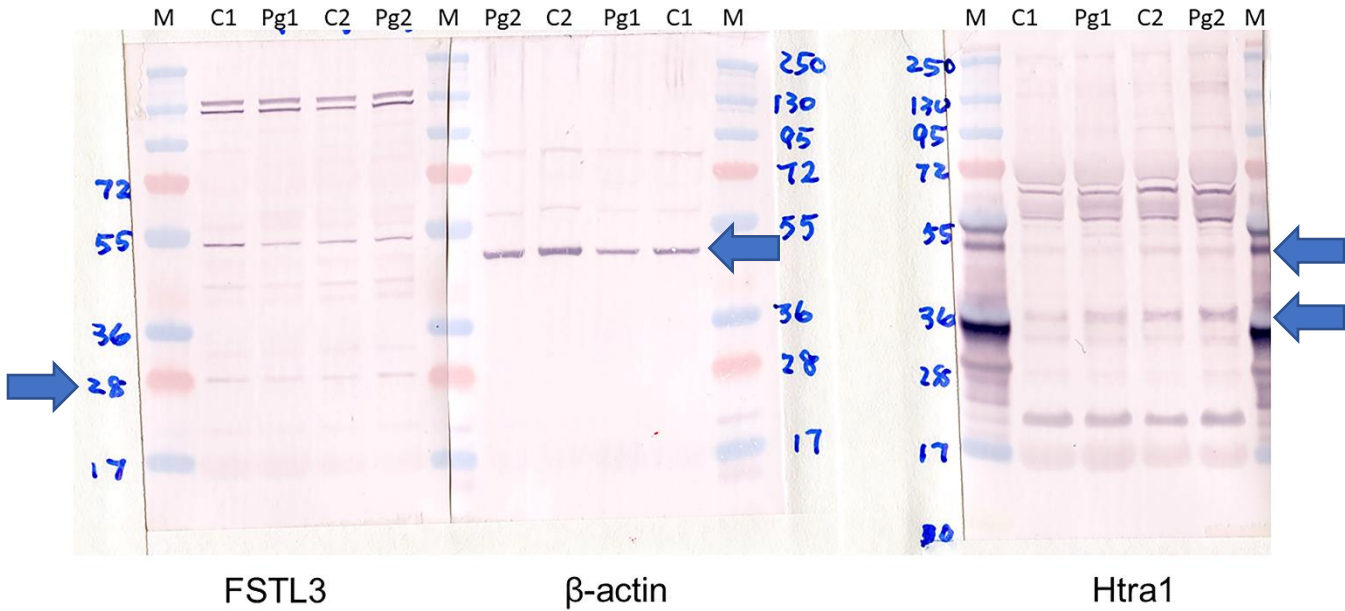

**Figure S7. Western blots of Follistatin-related protein 3 (FSTL3),  $\beta$ -actin, and Htra1 protein extracts obtained from the same placental specimens that were used for gene expression analysis (n = 2).** All blots are from the same protein extracts. FSTL3 (28 kDa) and  $\beta$ -actin (42 kDa) were run on the same gel and transferred to the same blot but were separated for final immunostaining. Protein extracts for detection of Htra1 were run on a separate gel. To obtain a digital image, all blots were simultaneously scanned with an Epson Perfection® V300 scanner. The digital image was imported into Microsoft Office 365 Power Point® for labeling columns and saved as a tiff file that was imported into Adobe Photoshop V 21.1.3 to increase picture resolution to 300 dpi. M = SeeBlue™ Plus2 pre-stained protein standard (Thermofisher, Waltham, MA), C = control, and Pg = *P. gingivalis*. Blue arrows indicate the bands of interest.

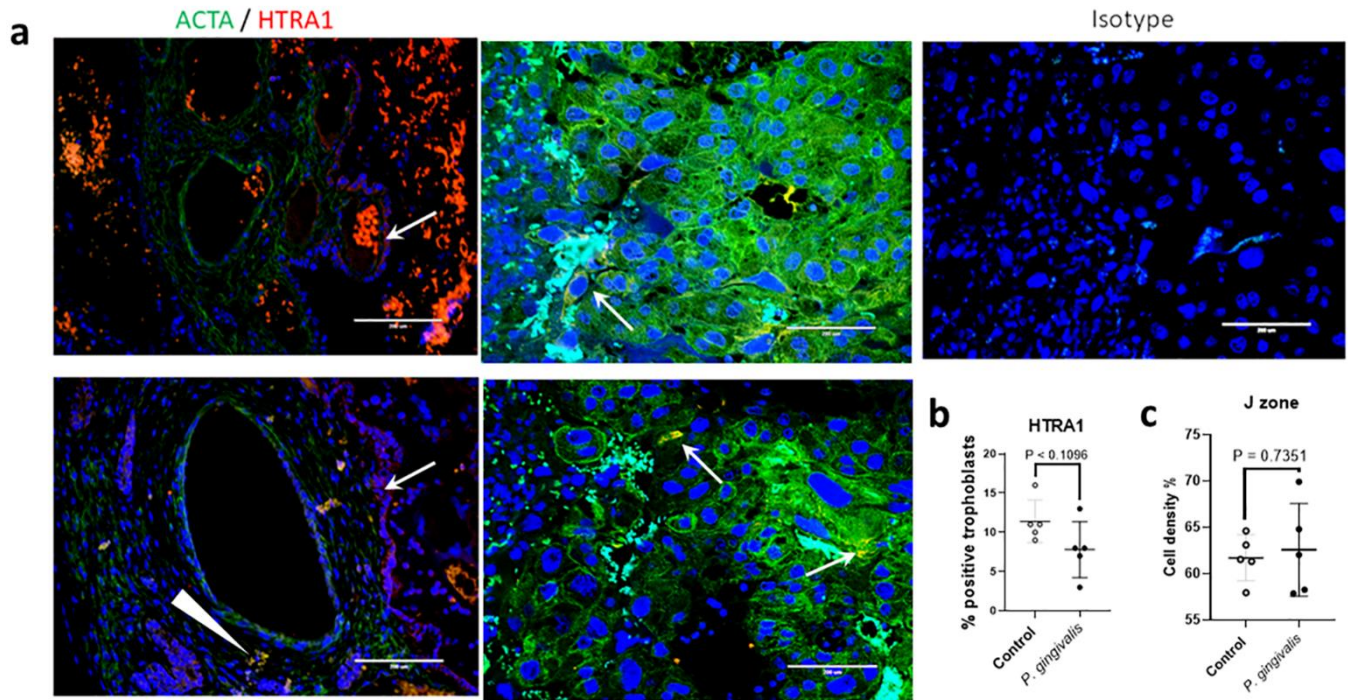

**Figure S8. Htra1 staining in SD placenta and spongiotrophoblast density.** (A) *In situ* distribution of Htra1 (red) the chorionic plate (left panel) and at the junctional zone (middle panel) of control and *P. gingivalis* infected SD placenta. Antibody to  $\alpha$ -actin (ACTA) was used to detect smooth muscle cells (green), and an antibody to cytokeratin 7 (CYTO7) was used to detect trophoblasts (green). Nuclei were stained with DAPI (blue). Arrowhead indicates HTRA1 positive smooth muscle cells. Arrows indicate HTRA1 positive trophoblasts. Scale bars = 200  $\mu$ m. **c** Percent spongiotrophoblasts and trophoblast giant cells positive for HTRA1 staining within the junctional zone. **d** Morphometric assessment of cell density within the junctional zone (J zone) performed on H and E stained specimens. Horizontal bars = mean  $\pm$  SD. Data analyzed by Student's t test.



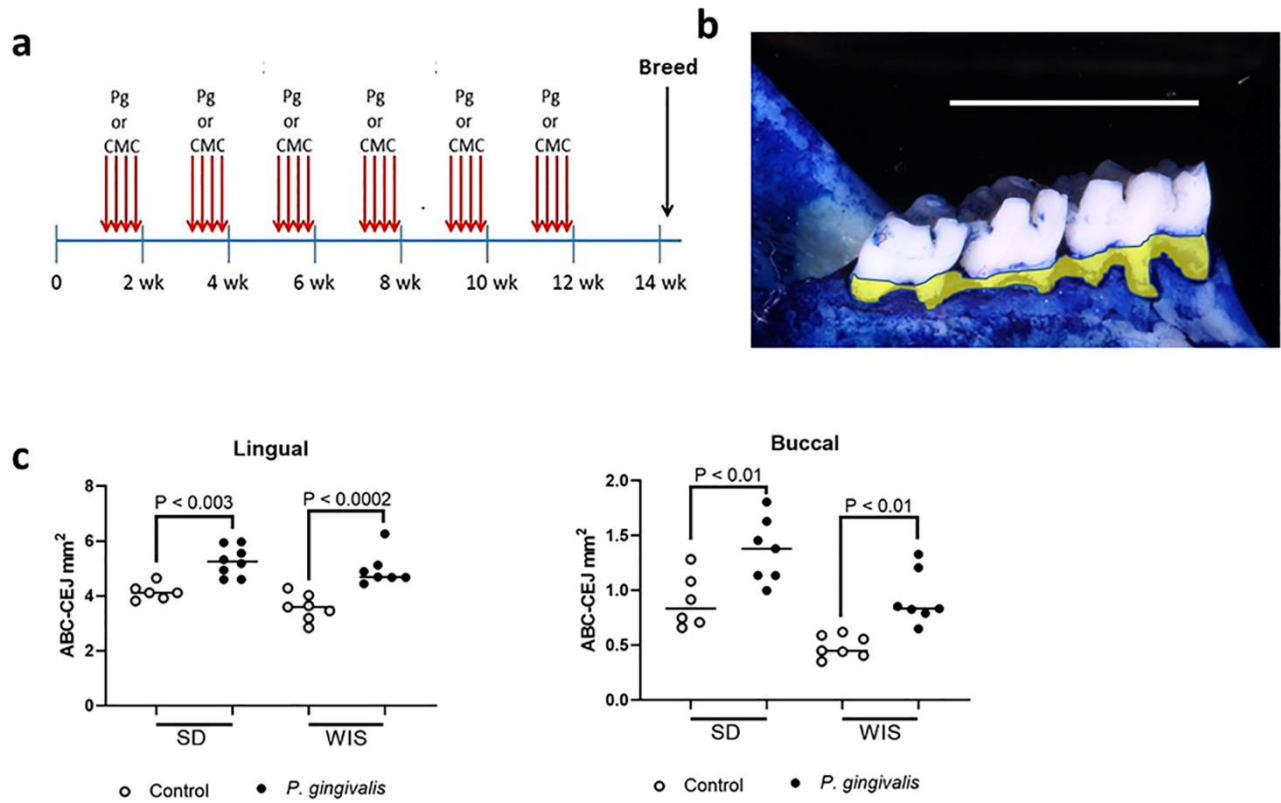

**Figure S9. Periodontitis model used in this study.** (A) Oral inoculation scheme used to produce periodontitis. (B) A representative image of the lingual side of the mandible. The yellow region illustrates how alveolar bone loss was traced and measured, which extends from the cemento-enamel junction (CEJ) to the alveolar bone crest (ABC). Scale bar = 5 mm. (C) The extent of alveolar bone loss in both SD and WIS rats.
